# Supplementary material for: Systematic evaluation of underlying defects in DNA repair as an approach to case-only assessment of familial prostate cancer
Source: PubMed Central journal article supplement (PMC4741850; doi:10.18632/oncotarget.5554), 2015-10-14
Supplement: oncotarget-06-39614-s001.pdf [file oncotarget-06-39614-s001.pdf]

## SUPPLEMENTARY TABLES

**Supplementary Table S1: Candidate genes list with sources nominating the genes.** The 826 candidate gene list was assembled from the sources listed in Table 2. This identifies the source(s) of nomination for each gene. A ranking number is indicated for the 3 lists that were ranked.

**Supplementary Table S2: *In silico* predictor scores for single nucleotide variants (SNVs) detected in the 12 patients.** All SNVs with more than 3 reads, Q scores higher than 25 and passing the candidate gene list filter are scored with 5 *in silico* predictors. Variants that scored non-neutral by at least 3 predictors (as defined in the Material and Method section) are considered for Sanger validation.

**Supplementary Table S3: Small in-frame deletions (Indels).** Provean, MutationTaster and SIFT-Indel entries for the Indel variants listed in Table 3, showing a damaging score by at least one predictor for each of the selected variants.

**Supplementary Table S4: Full variant description and representation in various populations.** In this Supplement to Table 3, the data presented in Table 3 are in bold. Additional information includes variant identification by rs number (when available), description at the cDNA level, and representation in the general population and in a set of white non-Hispanic without history of cancer in family (ITMI genomes set) (Bodian, et al., 2014).
